# Supplementary material for: Pivotal Role of Ubiquitin Carboxyl-Terminal Hydrolase L1 (UCHL1) in Uterine Leiomyoma
Source: MDPI journal article supplement (doi:10.3390/biom13020193), 2023-01-18

G T A A A C A G G T T C A T A A C

#1

No Mutation

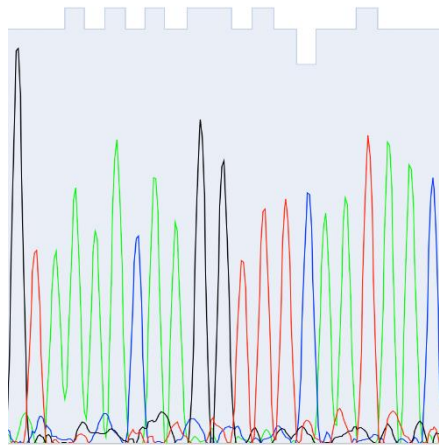

G T A A A C A G G T T C A T A A C

#2

No Mutation

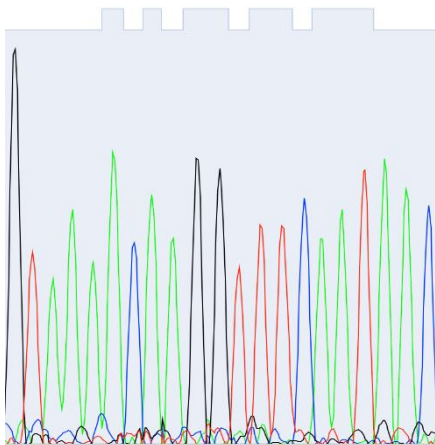

G T A A A C A G G T T C A T A A C

#3

No Mutation

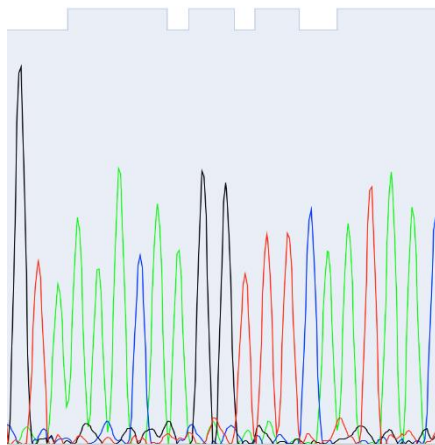

G T A A A C A G G T T C A T A A C

#4

g.71119404G>R G/A

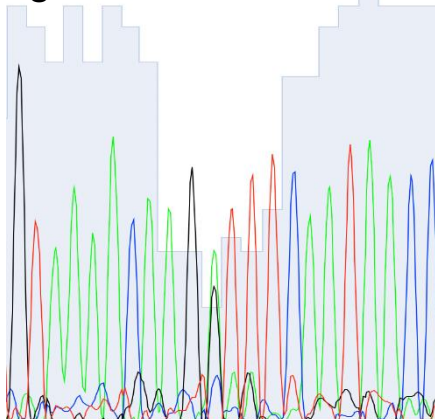

G T A A A C A G G T T C A T A A C

#5

g.71119404G>R G/A

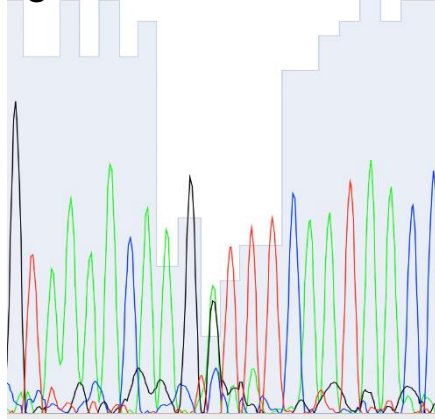

G T A A A C A G G T T C A T A A C

#6

g.71119404G>K G/T

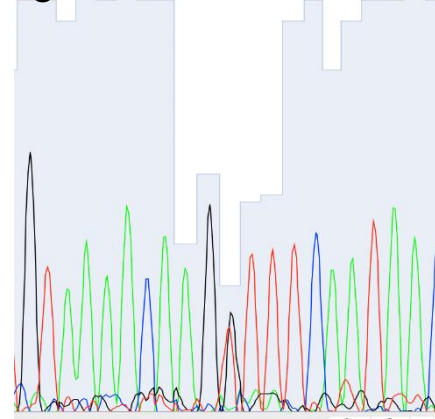

G T A A A C A G G T T C A T A A C

#7

g.71119404G>K G/T

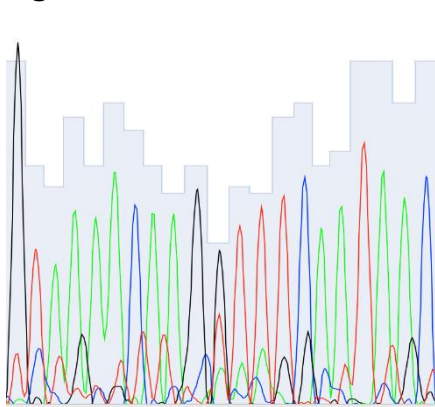

G T A A A C A G G T T C A T A A C

#8

g.71119404G>R G/A

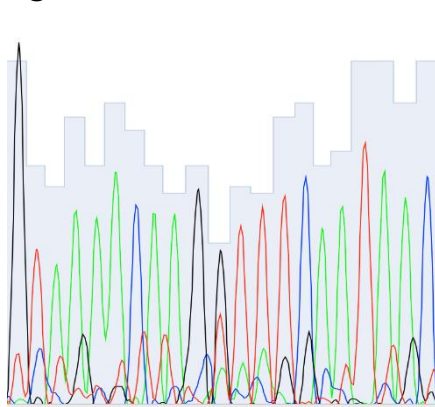

G T A A A C A G G T T C A T A A C

#9

g.71119404G>R G/A

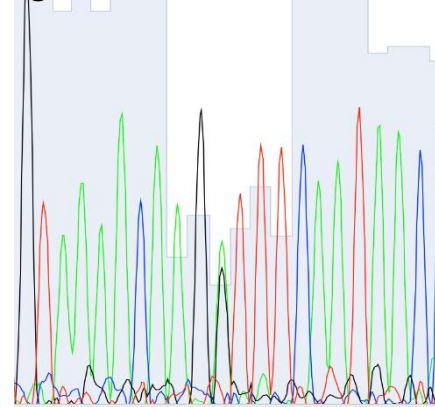

G T A A A C A A G G T T T C A A T A A C  
V K Q 100 R N 110

#10

No Mutation

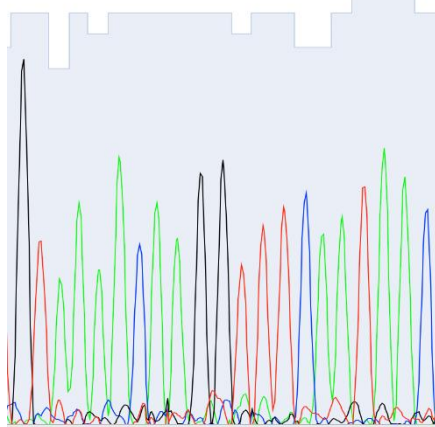

G T A A A C A A G G T T T C A A T A A C  
C 90 K E 100 F Q 110

#11

No Mutation

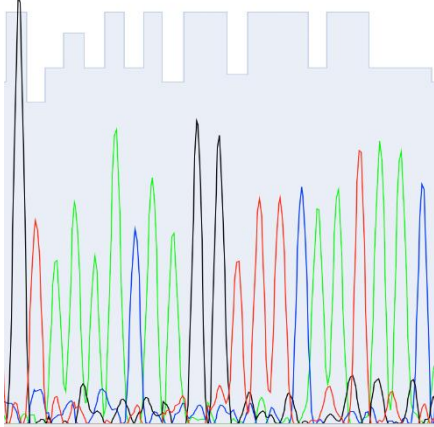

G T A A A C A A G G T T T C A A T A A C  
90 K Q 100 F Q 110

#12

No Mutation

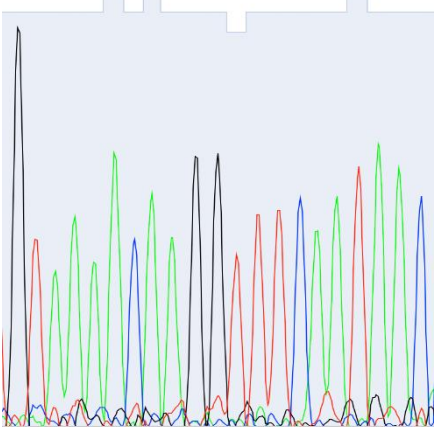

G T A A A C A A G G T T T C A A T A A C  
V K Q 100 R N 110

#13

No Mutation

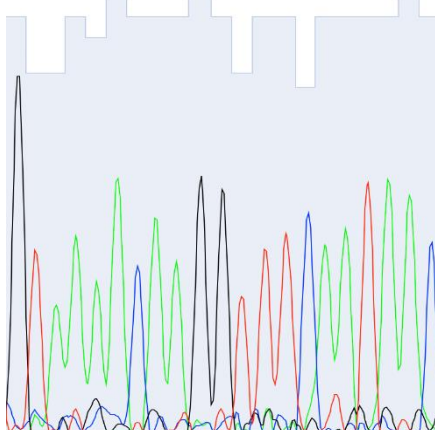

G T A A A C A A G G T T T C A A T A A C  
V K Q 100 R N 110

#14

No Mutation

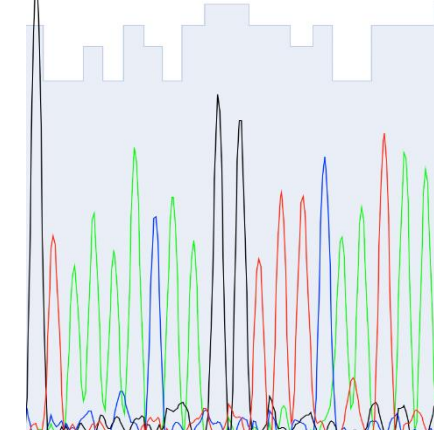

G T A A A C A A G G T T T C A A T A A C  
90 K N 100 V S 110

#15

No Mutation

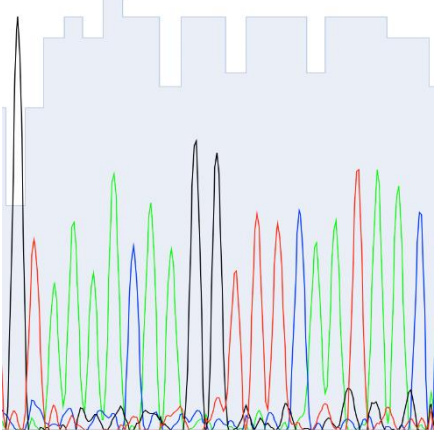

G T A A A C A A G G T T T C A A T A A C  
90 K N 100 V S 110

#16

No Mutation

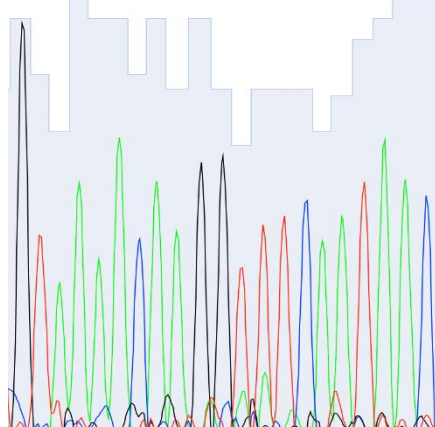

G T A A A C A A G G T T T C A A T A A C  
C 90 K E 100 R Q 110

#17

No Mutation

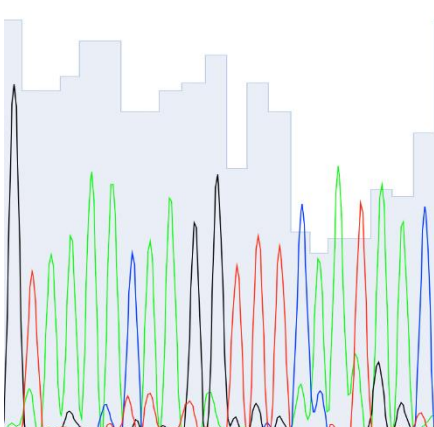

Supplement: s1 [file s1]
