# Supplementary figures and images for: Pivotal Role of Ubiquitin Carboxyl-Terminal Hydrolase L1 (UCHL1) in Uterine Leiomyoma
Source: MDPI journal article supplement (doi:10.3390/biom13020193), 2023-01-18

10x

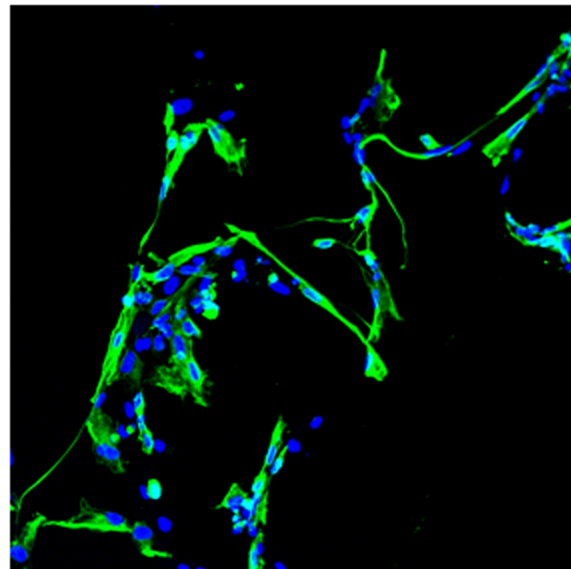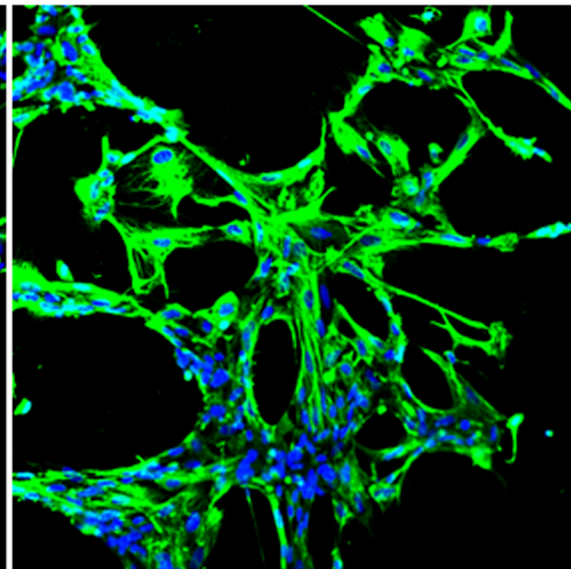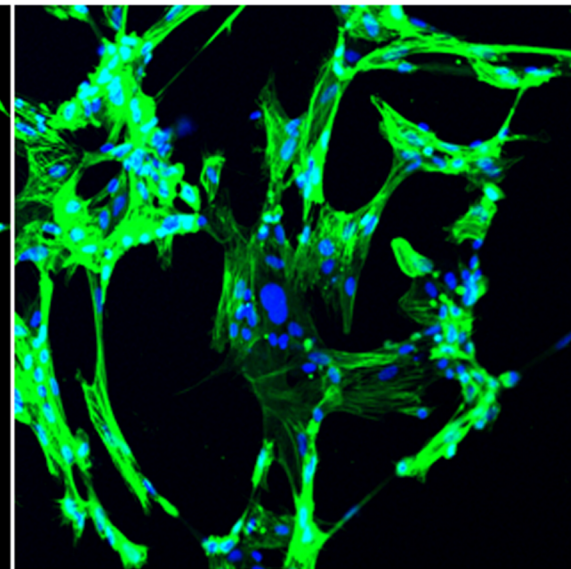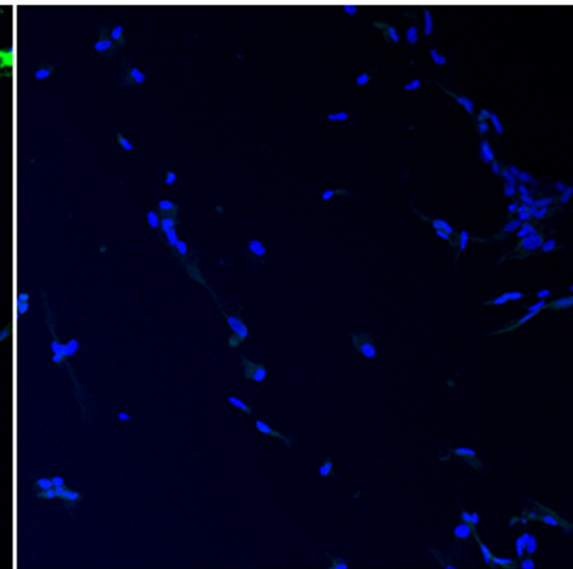

20x

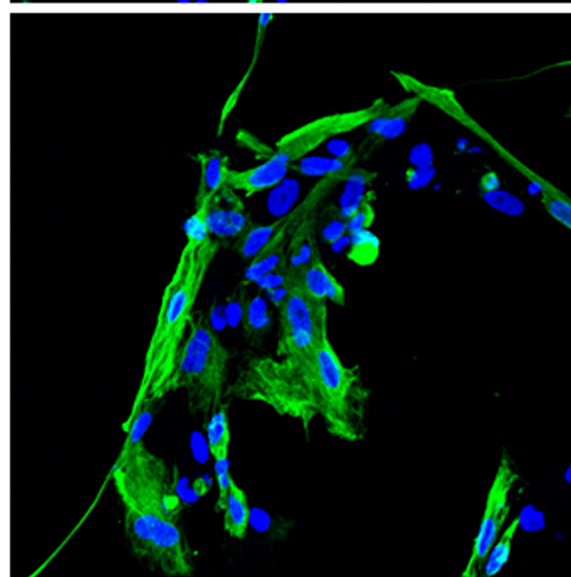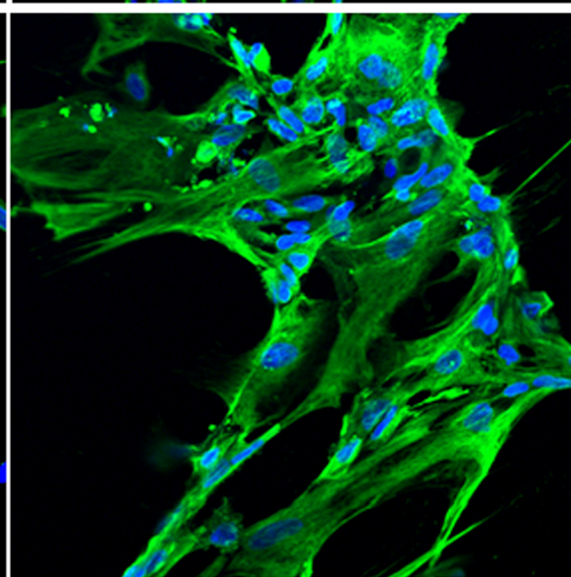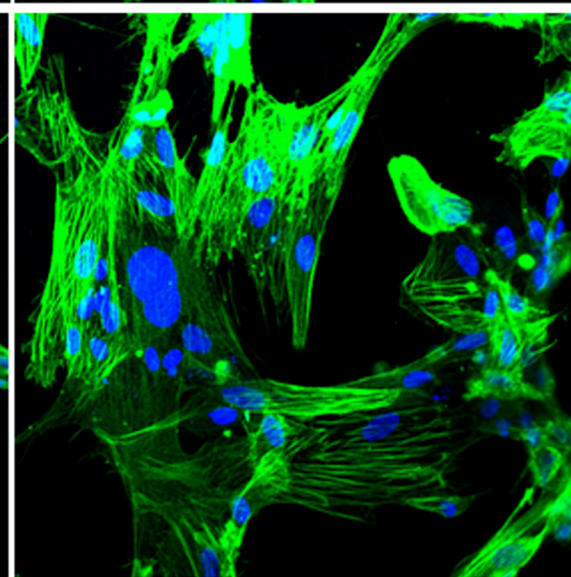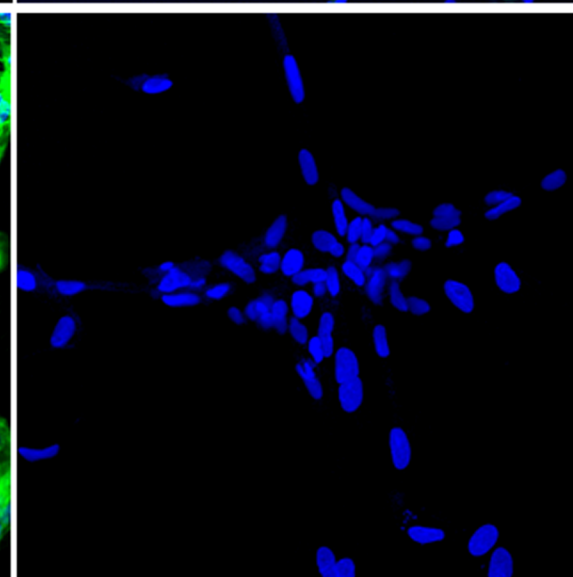

Desmin

Vimentin

ACTA2

Control

Supplement: s1 [file s1]

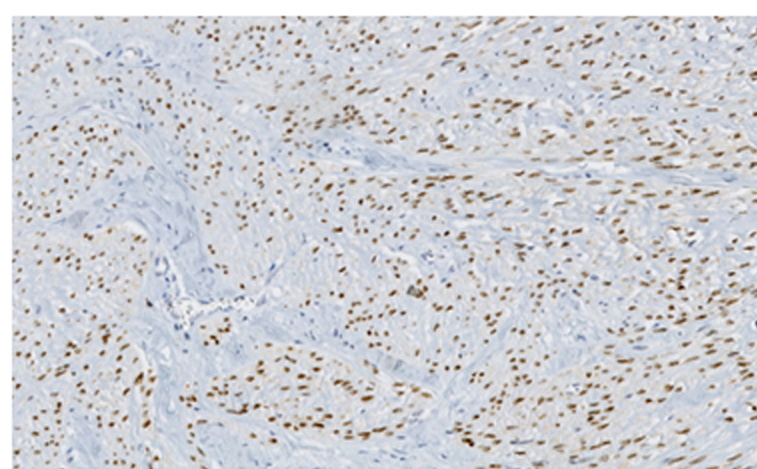

HMGA2++

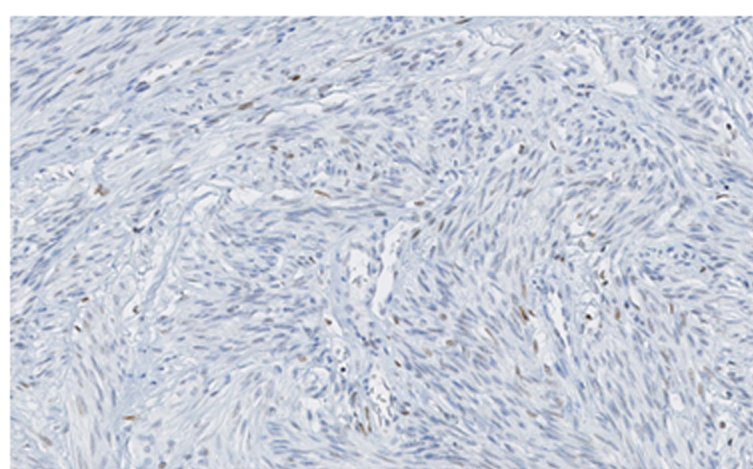

HMGA2+

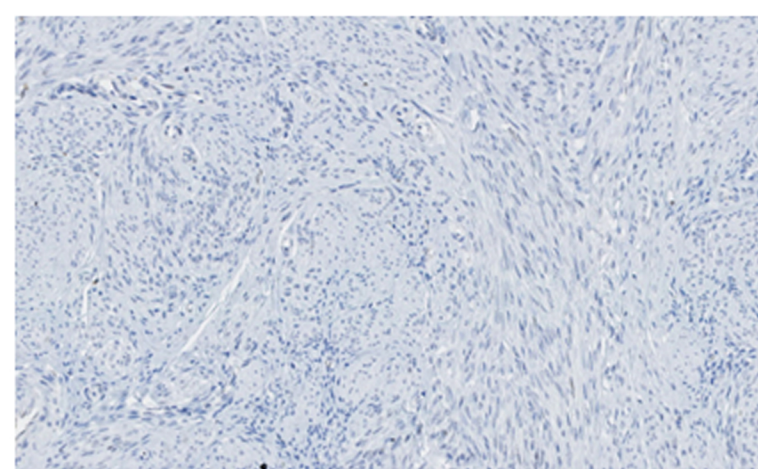

HMGA2-

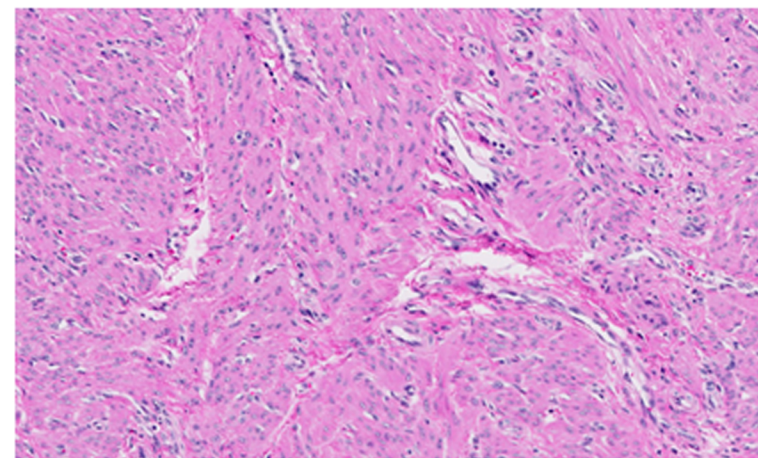

HE

Supplement: s1 [file s1]
